# Supplementary material for: Controlled fabrication of porous double-walled TiO2nanotubes via ultraviolet-assisted anodization
Source: Royal Society of Chemistry journal article supplement (doi:10.1039/c3nr05894h), 2014-01-01
Supplement: c3nr05894h.pdf [file c3nr05894h.pdf]

**Supporting Information on**

**Controlled fabrication of porous double-walled TiO<sub>2</sub> nanotubes**

**via ultraviolet-assisted anodization**

*Ghafar Ali, Hyun Jin Kim, Jae Joon Kim, and Sung Oh Cho\**

Department of Nuclear and Quantum Engineering, Korea Advanced Institute of Science and  
Technology, Daejeon 305-701 Korea, E-mail: [socho@kaist.ac.kr](mailto:socho@kaist.ac.kr)

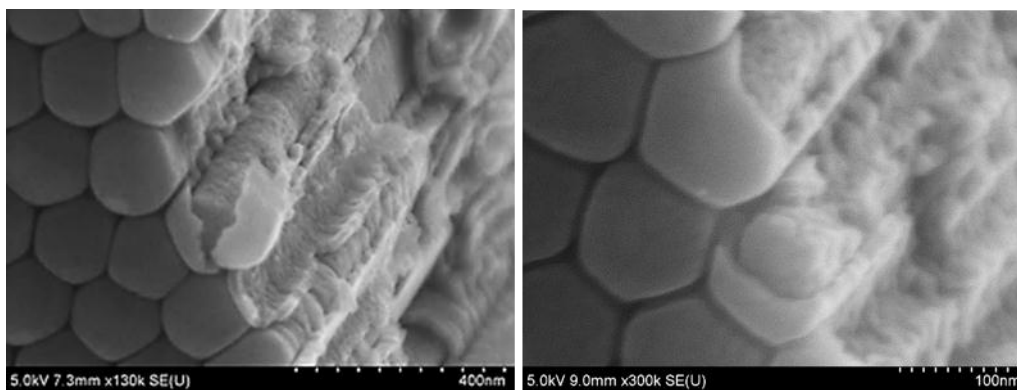

**Figure S1.** FESEM image (cross-sectional view) of the as-anodized double-walled TiO<sub>2</sub> nanotubes.

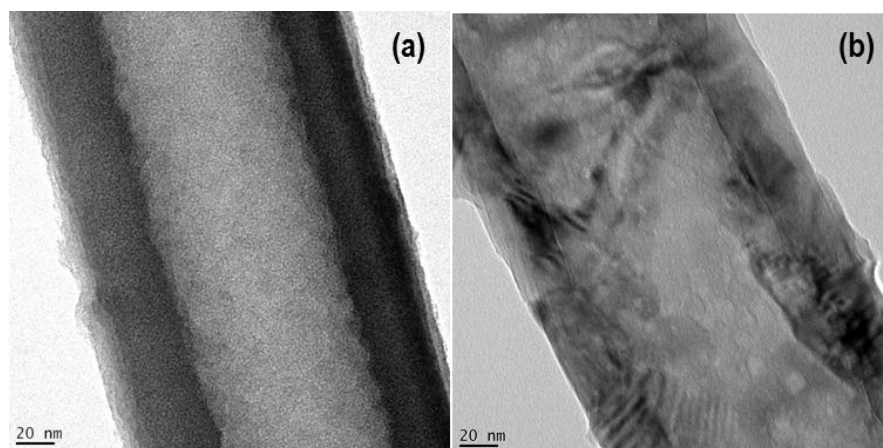

**Figure S2.** TEM image of the single-walled TiO<sub>2</sub> nanotubes prepared in the EG electrolyte at 60V without UV illumination: (a) as-anodized and (b) annealed nanotubes.

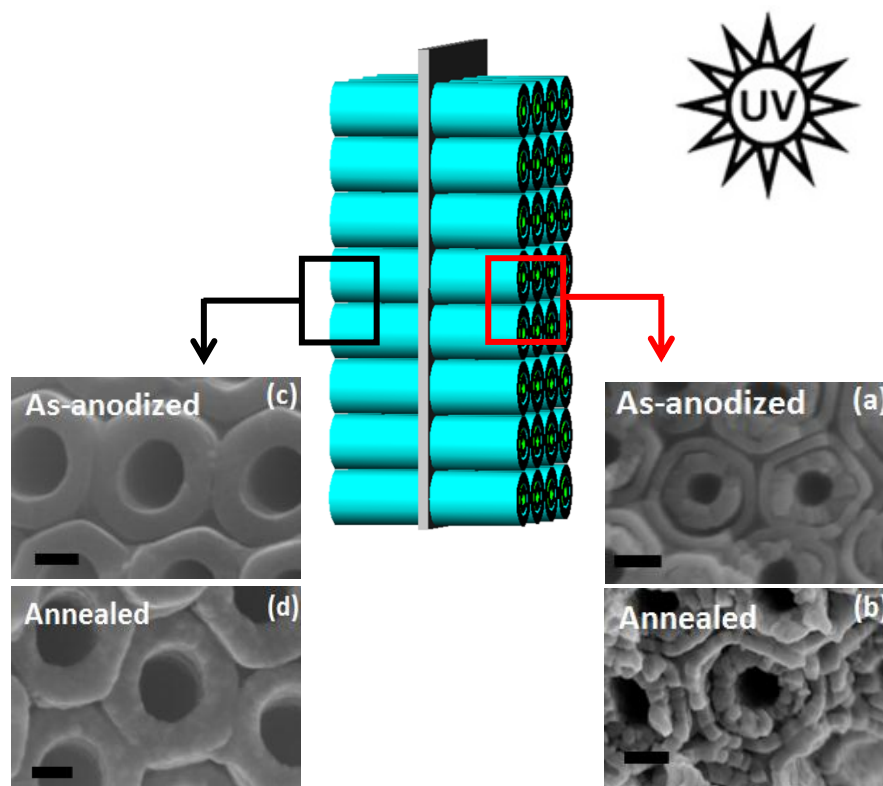

**Figure S3.** FESEM image of TiO<sub>2</sub> nanotubes formed on the UV-illuminated (a,b) and non-illuminated (c,d) side of a Ti sheet. Scale bars of the SEM images are 100 nm.

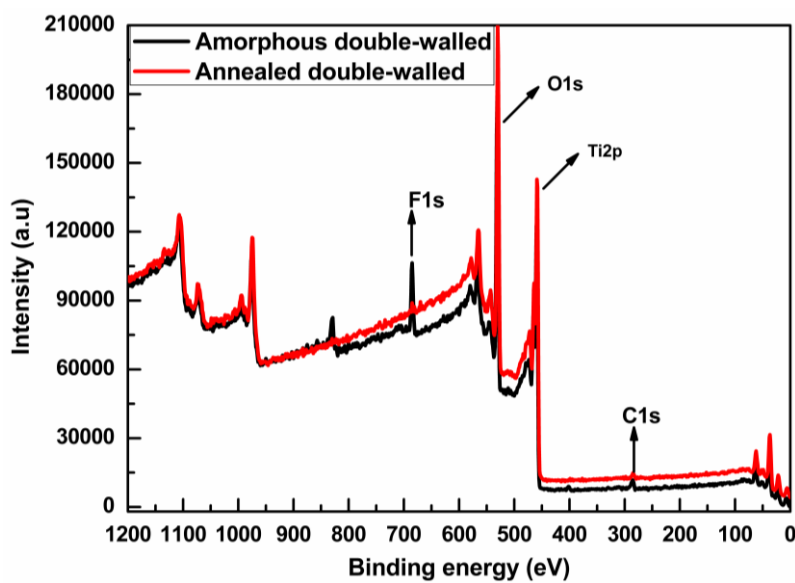

**Figure S4.** XPS survey spectra of the amorphous and annealed double-walled TiO<sub>2</sub> nanotubes.

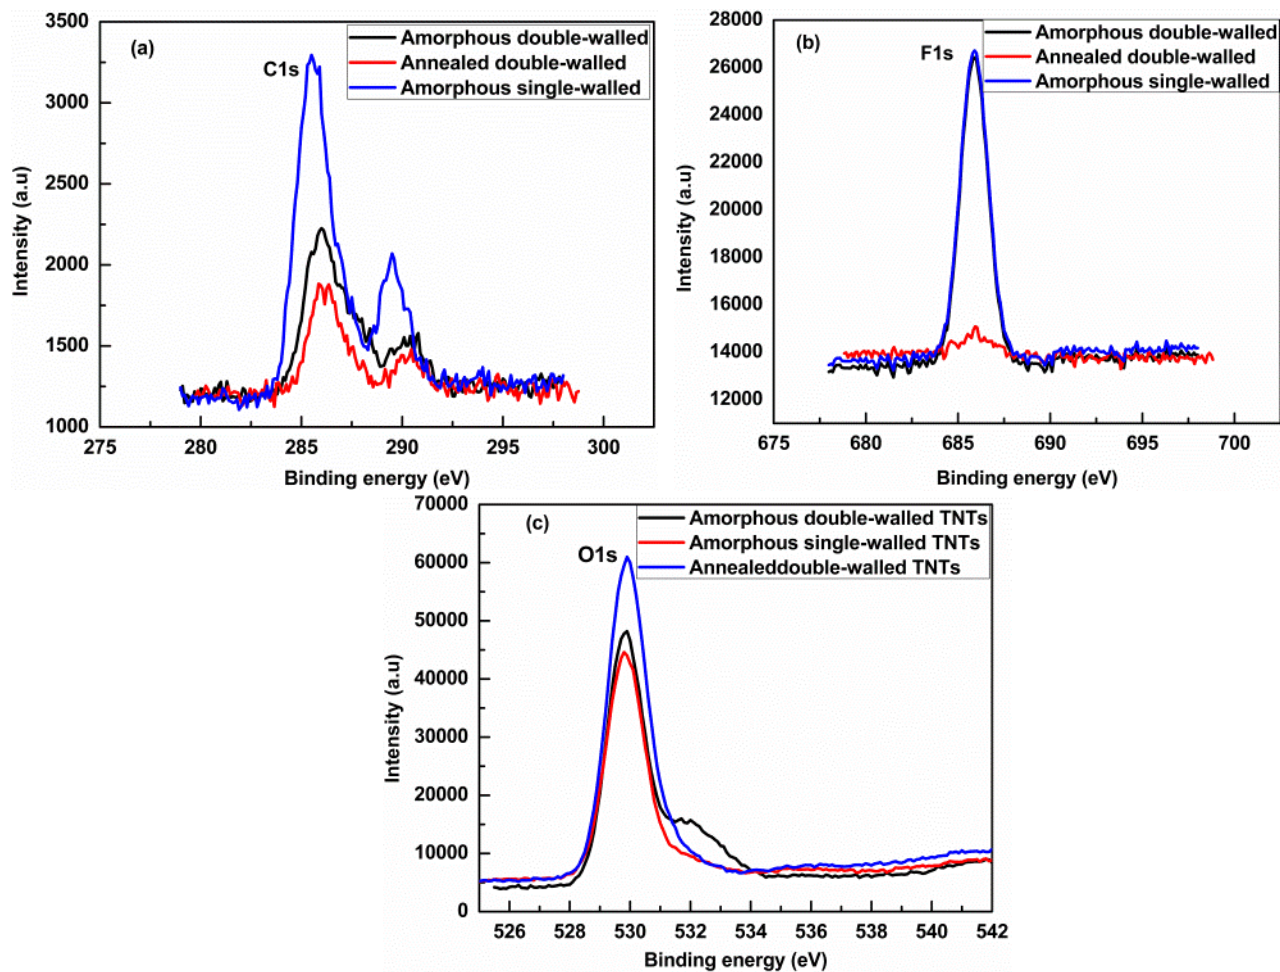

**Figure S5.** High resolution spectra of (a) C1s, (b) F1s and (c) O1s of amorphous single, amorphous double-walled, and annealed double-walled TiO<sub>2</sub> nanotubes (TNTs).

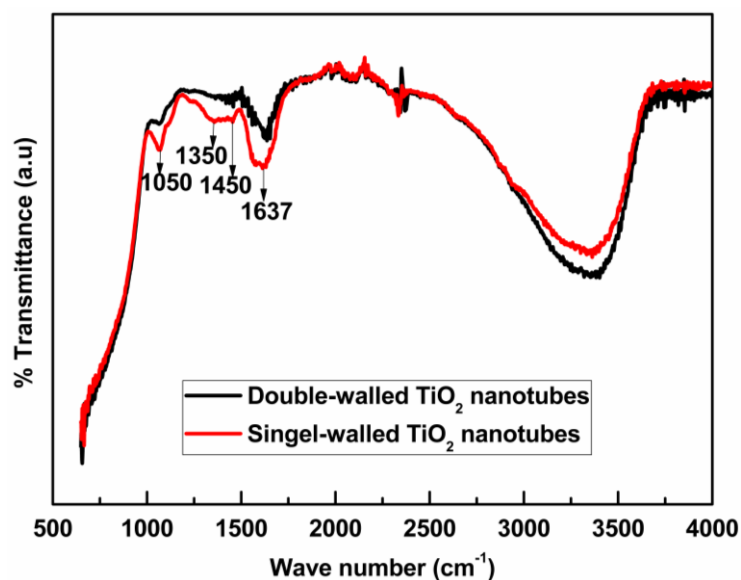

**Figure S6.** FTIR spectra of an as-anodized single-walled TiO<sub>2</sub> nanotubes prepared without UV-illumination and a double-walled TiO<sub>2</sub> nanotubes prepared under UV-illumination.

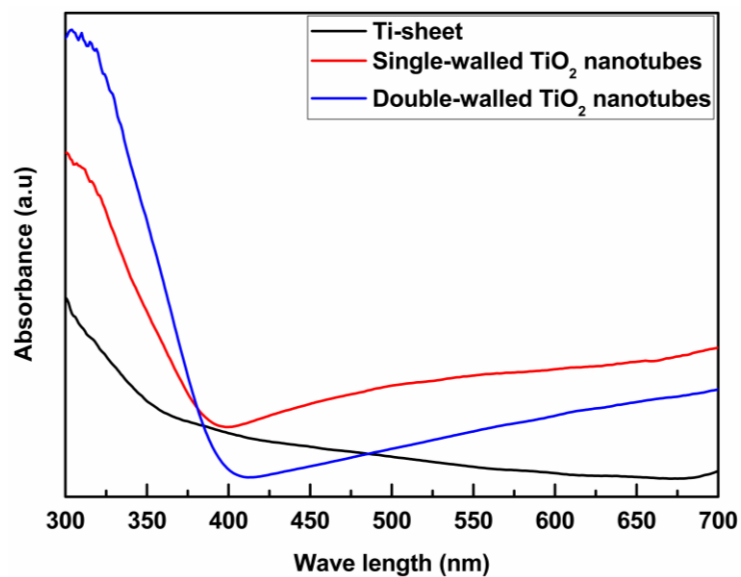

**Figure S7.** UV-vis absorption spectra of the single and doubled-wall TiO<sub>2</sub> nanotubes and Ti-sheet.

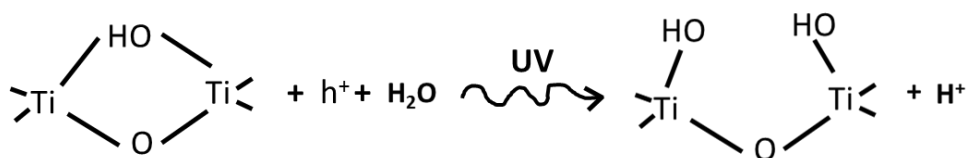

**Figure S8.** Hole-induced conversion of a single hydroxide bond to double hydroxide bonds through the interaction with a water molecule [21, 25, 26].

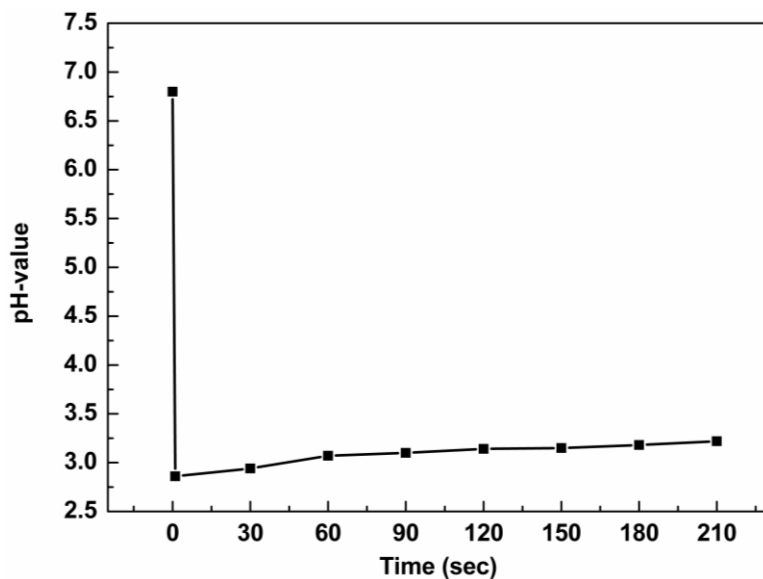

**Figure S9.** pH value of the electrolyte during the anodization with UV-illumination.

### **BET specific surface measurement and pore size distribution:**

The BET measurement show the specific surface area of the single and double-walled TiO<sub>2</sub> nanotubes attached on Ti-substrate is 1.8 m<sup>2</sup>/g and 2.8 m<sup>2</sup>/g, respectively. However, it should be noted that these results have large error and can show only the relative surface area between the two nanotubes. This is because the TiO<sub>2</sub> nanotubes are attached on a Ti metal substrate, and hence, the exact weight of only the TiO<sub>2</sub> nanotubes can't be determined [1]. In order to measure the specific surface area and the pore size distribution of TiO<sub>2</sub> nanotubes accurately and more precisely, TiO<sub>2</sub> nanotubes have to be separated from the substrates [1-3] which is beyond the scope of the present manuscript.

Figure S10a give the N<sub>2</sub> adsorption-desorption isotherm of the single and doubled-wall TiO<sub>2</sub> nanotubes. The isotherm shows the typical behavior of the mesoporous and macroporous morphology [3, 4]. The isotherm exhibit that the double-walled TiO<sub>2</sub> nanotubes have high specific surface area compared to the single-walled TiO<sub>2</sub> nanotubes [4]. Figure S10b displays the Barrett–Joyner–Halenda (BJH) pore-size distributions of the single and doubled-wall TiO<sub>2</sub> nanotubes. The pore size distributions are relatively wide, ranging between 2.6 and 160 nm. The doubled-wall TiO<sub>2</sub> nanotubes exhibit the presence of multi-modal porosity ranging from mesoporous to macroporous morphology, which is consistence with our SEM results.

### References

- [1]. D. R. Baker and P. V. Kamat, *J. Phys. Chem. C*, 2009, 113, 17967 – 17972.
- [2]. M. Paulose, H. E. Prakasan, O. K. Varghese, L. Peng, K. C. Popat, G. K. Mor, T. A. Desai, and C. A. Grimes, *J. Phys. Chem. C*, 2007, 111, 14992 – 14997.
- [3]. K. Wang, M. Wei, M. A. Morris, H. Zhou, and J. D. Holmes, *Adv. Mater.*, 2007, 19, 3016-3020.
- [4]. Chien-C. Tsai and H. Teng, *Chem. Mater.*, 2004, 16, 4352- 4358.

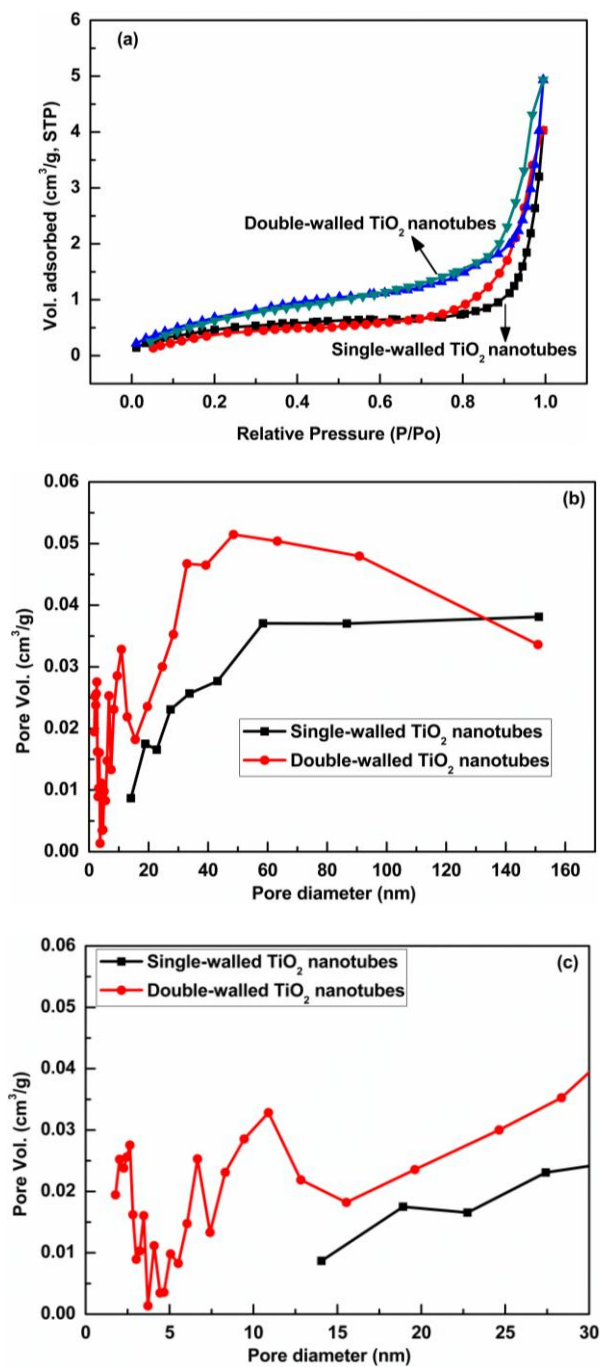

**Figure S10.** a) Nitrogen adsorption-desorption isotherm plots, and b) pore size distributions curve of the single and double-walled TiO<sub>2</sub> nanotubes, c) magnified part of ( b).
